# Supplementary material for: Assessment of Suicide in Japan During the COVID-19 Pandemic vs Previous Years
Source: PubMed Central journal article supplement (PMC7856546; doi:10.1001/jamanetworkopen.2020.37378), 2021-02-02

## Supplemental Online Content

Sakamoto H, Ishikane M, Ghaznavi C, Ueda P. Assessment of suicide in Japan during the COVID-19 pandemic vs previous years. *JAMA Netw Open.* 2021;4(2):e2037378.  
doi:10.1001/jamanetworkopen.2020.37378

**eTable 1.** Difference-in-Difference Model Assessing Suicides in April Through September 2020 vs 2016 to 2019 in Men by Occupational Status Group

**eTable 2.** Difference-in-Difference Model Assessing Suicides in April Through September 2020 vs 2016 to 2019 in Women by Occupational Status Group

**eTable 3.** Observed and Expected Monthly Suicide Rates Among Men in 2020 Based on Trends From 2011 to 2019 Stratified by Age

**eTable 4.** Observed and Expected Monthly Suicide Rates Among Women in 2020 Based on Trends From 2011 to 2019 Stratified by Age

**eFigure 1.** Observed and Expected Monthly Number of Individuals Who Died of Suicide in January Through November, 2011 to 2020, by Occupational Status Category

**eFigure 2.** Observed and Expected Monthly Suicide Rates in January to November, 2011 to 2020, in All Ages

**eFigure 3.** Observed and Expected Monthly Suicide Rates in January to November, 2011 to 2020, Among Individuals Aged Younger Than 30 Years

**eFigure 4.** Observed and Expected Monthly Suicide Rates in January to November, 2011 to 2020, Among Individuals Aged 30 to 49 Years

**eFigure 5.** Observed and Expected Monthly Suicide Rates in January to November, 2011 to 2020, Among Individuals Aged 50 to 69 Years

**eFigure 6.** Observed and Expected Monthly Suicide Rates in January to November, 2011 to 2020, Among Individuals Aged 70 Years or Older

This supplemental material has been provided by the authors to give readers additional information about their work.

**eTable 1.** Difference-in-Difference Model Assessing Suicides in April Through September 2020 vs 2016 to 2019 in Men by Occupational Status Group

|                                                                                                                                                                              | January | February | March | April            | May              | June            | July            | August          | September       | October         | November        |  |
|------------------------------------------------------------------------------------------------------------------------------------------------------------------------------|---------|----------|-------|------------------|------------------|-----------------|-----------------|-----------------|-----------------|-----------------|-----------------|--|
| <b>Family business/self-employed</b>                                                                                                                                         |         |          |       |                  |                  |                 |                 |                 |                 |                 |                 |  |
| 2016-2019, mean n                                                                                                                                                            | 98      | 93       | 110   | 98               | 106              | 96              | 88              | 86              | 94              | 99              | 87              |  |
| 2020, n                                                                                                                                                                      | 99      | 95       | 96    | 79               | 72               | 76              | 66              | 80              | 70              | 79              | 74              |  |
| Difference-in-difference (95% CI) <sup>a</sup>                                                                                                                               |         |          |       | -15 (-44 to 14)  | -31 (-59 to -2)  | -16 (-45 to 12) | -18 (-47 to 11) | -2 (-31 to 26)  | -20 (-49 to 9)  | -16 (-46 to 14) | -10 (-39 to 20) |  |
| <b>Employee</b>                                                                                                                                                              |         |          |       |                  |                  |                 |                 |                 |                 |                 |                 |  |
| 2016-2019, mean n                                                                                                                                                            | 414     | 353      | 424   | 382              | 407              | 367             | 371             | 353             | 369             | 369             | 342             |  |
| 2020, n                                                                                                                                                                      | 405     | 314      | 408   | 291              | 333              | 287             | 365             | 396             | 410             | 475             | 384             |  |
| Difference-in-difference (95% CI) <sup>a</sup>                                                                                                                               |         |          |       | -70 (-128 to 12) | -53 (-111 to 5)  | -59 (-117 to 1) | 15 (-43 to 73)  | 64 (6 to 123)   | 62 (4 to 120)   | 128 (65 to 191) | 63 (0 to 126)   |  |
| <b>Student</b>                                                                                                                                                               |         |          |       |                  |                  |                 |                 |                 |                 |                 |                 |  |
| 2016-2019, mean n                                                                                                                                                            | 85      | 81       | 91    | 90               | 70               | 69              | 77              | 75              | 94              | 86              | 68              |  |
| 2020, n                                                                                                                                                                      | 80      | 62       | 80    | 62               | 84               | 78              | 90              | 128             | 138             | 94              | 116             |  |
| Difference-in-difference (95% CI) <sup>a</sup>                                                                                                                               |         |          |       | -16 (-54 to 22)  | 26 (-12 to 64)   | 21 (-18 to 59)  | 25 (-14 to 63)  | 65 (27 to 103)  | 56 (17 to 94)   | 20 (-17 to 57)  | 60 (23 to 97)   |  |
| <b>Unemployed</b>                                                                                                                                                            |         |          |       |                  |                  |                 |                 |                 |                 |                 |                 |  |
| 2016-2019, mean n                                                                                                                                                            | 479     | 464      | 584   | 539              | 574              | 518             | 538             | 497             | 487             | 490             | 482             |  |
| 2020, n                                                                                                                                                                      | 454     | 401      | 505   | 456              | 445              | 454             | 496             | 487             | 473             | 501             | 513             |  |
| Difference-in-difference (95% CI) <sup>a</sup>                                                                                                                               |         |          |       | -28 (-133 to 77) | -73 (-179 to 32) | -8 (-114 to 97) | 14 (-92 to 119) | 45 (-60 to 151) | 41 (-64 to 147) | 66 (-40 to 173) | 87 (-20 to 193) |  |
| N=2726 suicides with missing data on occupational status were not included in the analyses.                                                                                  |         |          |       |                  |                  |                 |                 |                 |                 |                 |                 |  |
| <sup>a</sup> Subtraction of differences in January through April from differences in April through September. Negative values represent fewer suicides in 2020 vs 2016-2019. |         |          |       |                  |                  |                 |                 |                 |                 |                 |                 |  |

**eTable 2.** Difference-in-Difference Model Assessing Suicides in April Through September 2020 vs 2016 to 2019 in Women by Occupational Status Group

|                                                                                             | January | February | March | April           | May             | June           | July           | August         | September      | October          | November       |
|---------------------------------------------------------------------------------------------|---------|----------|-------|-----------------|-----------------|----------------|----------------|----------------|----------------|------------------|----------------|
| <b>Family business/self-employed</b>                                                        |         |          |       |                 |                 |                |                |                |                |                  |                |
| 2016-2019, mean n                                                                           | 12      | 13       | 14    | 16              | 13              | 13             | 12             | 11             | 13             | 12               | 13             |
| 2020, n                                                                                     | 14      | 9        | 10    | 8               | 9               | 14             | 12             | 7              | 16             | 16               | 18             |
| Difference-in-difference (95% CI) <sup>a</sup>                                              |         |          |       | -6 (-15 to 3)   | -2 (-11 to 7)   | 3 (-6 to 12)   | 2 (-7 to 11)   | -2 (-11 to 7)  | 5 (-4 to 14)   | 6 (-2 to 15)     | 7 (-2 to 15)   |
| <b>Employee</b>                                                                             |         |          |       |                 |                 |                |                |                |                |                  |                |
| 2016-2019, mean n                                                                           | 80      | 83       | 85    | 81              | 93              | 72             | 85             | 90             | 81             | 81               | 82             |
| 2020, n                                                                                     | 93      | 65       | 92    | 63              | 93              | 86             | 124            | 118            | 123            | 175              | 131            |
| Difference-in-difference (95% CI) <sup>a</sup>                                              |         |          |       | -19 (-53 to 16) | -1 (-36 to 34)  | 13 (-21 to 48) | 38 (3 to 73)   | 27 (-8 to 62)  | 41 (6 to 76)   | 93 (60 to 125)   | 48 (15 to 81)  |
| <b>Student</b>                                                                              |         |          |       |                 |                 |                |                |                |                |                  |                |
| 2016-2019, mean n                                                                           | 39      | 34       | 38    | 41              | 37              | 33             | 35             | 35             | 33             | 36               | 29             |
| 2020, n                                                                                     | 60      | 48       | 38    | 28              | 30              | 42             | 40             | 96             | 70             | 54               | 58             |
| Difference-in-difference (95% CI) <sup>a</sup>                                              |         |          |       | -25 (-48 to -1) | -18 (-42 to 5)  | -3 (-26 to 21) | -7 (-30 to 17) | 50 (26 to 73)  | 25 (2 to 49)   | 6 (-18 to 31)    | 17 (-7 to 42)  |
| <b>Homemaker</b>                                                                            |         |          |       |                 |                 |                |                |                |                |                  |                |
| 2016-2019, mean n                                                                           | 89      | 77       | 86    | 91              | 98              | 91             | 96             | 80             | 81             | 79               | 79             |
| 2020, n                                                                                     | 54      | 59       | 71    | 73              | 77              | 69             | 105            | 105            | 89             | 141              | 95             |
| Difference-in-difference (95% CI) <sup>a</sup>                                              |         |          |       | 4 (-31 to 39)   | 2 (-34 to 37)   | 1 (-35 to 36)  | 32 (-3 to 67)  | 47 (12 to 82)  | 31 (-5 to 66)  | 85 (50 to 120)   | 38 (4 to 73)   |
| <b>Unemployed</b>                                                                           |         |          |       |                 |                 |                |                |                |                |                  |                |
| 2016-2019, mean n                                                                           | 264     | 248      | 295   | 284             | 299             | 281            | 272            | 252            | 260            | 248              | 265            |
| 2020, n                                                                                     | 235     | 207      | 242   | 221             | 226             | 244            | 302            | 285            | 302            | 368              | 278            |
| Difference-in-difference (95% CI) <sup>a</sup>                                              |         |          |       | -22 (-82 to 37) | -32 (-92 to 27) | 4 (-56 to 63)  | 70 (11 to 130) | 74 (14 to 134) | 83 (23 to 142) | 161 (100 to 223) | 54 (-8 to 115) |
| N=1225 suicides with missing data on occupational status were not included in the analyses. |         |          |       |                 |                 |                |                |                |                |                  |                |

<sup>a</sup> Subtraction of differences in January through April from differences in April through September.  
Negative values represent fewer suicides in 2020 vs 2016-2019.

|  |  |  |  |  |
|--|--|--|--|--|
|  |  |  |  |  |
|--|--|--|--|--|

**eTable 3.** Observed and Expected Monthly Suicide Rates Among Men in 2020 Based on Trends From 2011 to 2019 Stratified by Age

|                                          | January             | February            | March              | April               | May                 | June                | July                | August              | September           | October             | November            |
|------------------------------------------|---------------------|---------------------|--------------------|---------------------|---------------------|---------------------|---------------------|---------------------|---------------------|---------------------|---------------------|
| <b>Total</b>                             |                     |                     |                    |                     |                     |                     |                     |                     |                     |                     |                     |
| Yearly change 2011-2019, % (95% CI)      | -5.5 (-7.1 to -3.8) | -5.1 (-6.1 to -4.1) | -4.7 (-6 to -3.4)  | -5.7 (-7.3 to -4.1) | -6.7 (-9.3 to -4.1) | -6.5 (-8.3 to -4.8) | -5.4 (-6.8 to -4.1) | -5.5 (-6.9 to -4.2) | -4.9 (-6.6 to -3.2) | -5.6 (-7.1 to -4.1) | -5 (-6.5 to -3.5)   |
| Observed rate in 2020                    | 1.77                | 1.49                | 1.85               | 1.54                | 1.59                | 1.57                | 1.77                | 1.87                | 1.88                | 2.03                | 1.85                |
| Expected rate in 2020 (95% CI)           | 1.59 (1.4 - 1.82)   | 1.49 (1.37 - 1.61)  | 1.84 (1.66 - 2.04) | 1.65 (1.46 - 1.87)  | 1.68 (1.37 - 2.07)  | 1.53 (1.33 - 1.75)  | 1.6 (1.44 - 1.79)   | 1.53 (1.38 - 1.71)  | 1.62 (1.42 - 1.85)  | 1.56 (1.39 - 1.76)  | 1.5 (1.33 - 1.69)   |
| Observed vs expected rate ratio (95% CI) | 1.11 (1.04 - 1.17)  | 1 (0.94 - 1.07)     | 1.01 (0.95 - 1.07) | 0.93 (0.88 - 0.99)  | 0.95 (0.89 - 1.01)  | 1.03 (0.96 - 1.09)  | 1.11 (1.04 - 1.17)  | 1.22 (1.15 - 1.29)  | 1.16 (1.09 - 1.23)  | 1.3 (1.23 - 1.37)   | 1.24 (1.17 - 1.31)  |
| <b>&lt;30 y</b>                          |                     |                     |                    |                     |                     |                     |                     |                     |                     |                     |                     |
| Yearly change 2011-2019, % (95% CI)      | -2.8 (-4.8 to -0.8) | -2.3 (-5.9 to 1.2)  | -4.6 (-7.2 to -2)  | -4.8 (-8 to -1.6)   | -6.2 (-8.2 to -4.2) | -3.6 (-6.5 to -0.6) | -4.2 (-7 to -1.5)   | -3.3 (-4.9 to -1.7) | -3.8 (-7.7 to 0.1)  | -3.8 (-6.6 to -0.9) | -4.6 (-6.4 to -2.8) |
| Observed rate in 2020                    | 0.96                | 0.75                | 0.89               | 0.82                | 0.84                | 0.78                | 1.03                | 1.22                | 1.33                | 1.07                | 1                   |
| Expected rate in 2020 (95% CI)           | 0.85 (0.73 - 1)     | 0.78 (0.59 - 1.03)  | 0.85 (0.69 - 1.05) | 0.82 (0.63 - 1.06)  | 0.77 (0.66 - 0.9)   | 0.81 (0.64 - 1.03)  | 0.77 (0.62 - 0.95)  | 0.79 (0.7 - 0.9)    | 0.79 (0.58 - 1.08)  | 0.77 (0.61 - 0.96)  | 0.67 (0.58 - 0.78)  |
| Observed vs expected rate ratio (95% CI) | 1.13 (0.96 - 1.3)   | 0.96 (0.8 - 1.13)   | 1.04 (0.88 - 1.21) | 1.01 (0.84 - 1.17)  | 1.08 (0.91 - 1.26)  | 0.96 (0.79 - 1.12)  | 1.34 (1.14 - 1.54)  | 1.54 (1.33 - 1.75)  | 1.68 (1.46 - 1.89)  | 1.4 (1.2 - 1.61)    | 1.48 (1.26 - 1.71)  |
| <b>30-49 y</b>                           |                     |                     |                    |                     |                     |                     |                     |                     |                     |                     |                     |

|                                          |                     |                     |                     |                      |                     |                      |                     |                     |                     |                     |                     |
|------------------------------------------|---------------------|---------------------|---------------------|----------------------|---------------------|----------------------|---------------------|---------------------|---------------------|---------------------|---------------------|
| Yearly change 2011-2019, % (95% CI)      | -5.3 (-8 to -2.5)   | -5.4 (-7 to -3.8)   | -5.2 (-7.1 to -3.3) | -5 (-7 to -3.1)      | -6.4 (-9.9 to -2.9) | -6 (-8 to -4.1)      | -4.2 (-6.5 to -1.9) | -6.4 (-8.5 to -4.2) | -3.5 (-5.5 to -1.4) | -5.7 (-7.7 to -3.8) | -4.8 (-6.8 to -2.8) |
| Observed rate in 2020                    | 1.96                | 1.67                | 2.22                | 1.43                 | 1.88                | 1.69                 | 1.95                | 1.98                | 1.96                | 2.53                | 2.15                |
| Expected rate in 2020 (95% CI)           | 1.91 (1.53 - 2.39)  | 1.68 (1.48 - 1.91)  | 2.01 (1.73 - 2.33)  | 1.9 (1.63 - 2.21)    | 1.9 (1.44 - 2.5)    | 1.69 (1.45 - 1.97)   | 1.82 (1.52 - 2.18)  | 1.66 (1.4 - 1.96)   | 1.85 (1.58 - 2.18)  | 1.74 (1.49 - 2.04)  | 1.69 (1.44 - 1.98)  |
| Observed vs expected rate ratio (95% CI) | 1.02 (0.91 - 1.14)  | 0.99 (0.87 - 1.11)  | 1.11 (0.99 - 1.22)  | 0.76 (0.66 - 0.85)   | 0.99 (0.88 - 1.1)   | 1 (0.88 - 1.12)      | 1.07 (0.95 - 1.19)  | 1.2 (1.07 - 1.33)   | 1.06 (0.94 - 1.17)  | 1.46 (1.32 - 1.6)   | 1.27 (1.14 - 1.4)   |
| <b>50-69 y</b>                           |                     |                     |                     |                      |                     |                      |                     |                     |                     |                     |                     |
| Yearly change 2011-2019, % (95% CI)      | -7.6 (-9 to -6.3)   | -7.4 (-9.6 to -5.3) | -5.4 (-6.9 to -3.9) | -8.1 (-10.9 to -5.3) | -7.6 (-11 to -4.2)  | -8.6 (-11.2 to -5.9) | -6.7 (-9 to -4.3)   | -6.9 (-8.6 to -5.3) | -6.4 (-8.5 to -4.4) | -7 (-9.6 to -4.3)   | -5.6 (-7.8 to -3.4) |
| Observed rate in 2020                    | 2.11                | 1.94                | 2.25                | 1.95                 | 1.66                | 1.79                 | 1.86                | 2.01                | 1.94                | 2.29                | 2.08                |
| Expected rate in 2020 (95% CI)           | 1.85 (1.66 - 2.06)  | 1.7 (1.44 - 2.02)   | 2.34 (2.07 - 2.64)  | 1.86 (1.49 - 2.33)   | 2.05 (1.57 - 2.69)  | 1.72 (1.4 - 2.13)    | 1.9 (1.58 - 2.28)   | 1.7 (1.49 - 1.94)   | 1.85 (1.58 - 2.18)  | 1.81 (1.47 - 2.23)  | 1.81 (1.52 - 2.15)  |
| Observed vs expected rate ratio (95% CI) | 1.14 (1.02 - 1.27)  | 1.14 (1.01 - 1.26)  | 0.96 (0.86 - 1.06)  | 1.05 (0.93 - 1.17)   | 0.81 (0.71 - 0.91)  | 1.04 (0.92 - 1.16)   | 0.98 (0.87 - 1.09)  | 1.18 (1.05 - 1.31)  | 1.05 (0.93 - 1.16)  | 1.27 (1.14 - 1.4)   | 1.15 (1.03 - 1.27)  |
| <b>≥70 y</b>                             |                     |                     |                     |                      |                     |                      |                     |                     |                     |                     |                     |
| Yearly change 2011-                      | -4.3 (-7.1 to -1.5) | -2.9 (-7 to 1.2)    | -3 (-5.9 to -0.2)   | -4 (-4.9 to -3.1)    | -6.5 (-8.7 to -4.3) | -6.8 (-9.1 to -4.5)  | -6.8 (-8.8 to -4.7) | -4.9 (-6.1 to -3.6) | -6.2 (-8.6 to -3.9) | -5.7 (-8.2 to -3.1) | -5.8 (-7.4 to -4.2) |

|                                                                                                                                                    |                       |                       |                       |                       |                          |                       |                          |                       |                       |                      |                       |  |
|----------------------------------------------------------------------------------------------------------------------------------------------------|-----------------------|-----------------------|-----------------------|-----------------------|--------------------------|-----------------------|--------------------------|-----------------------|-----------------------|----------------------|-----------------------|--|
| 2019, %<br>(95% CI)                                                                                                                                |                       |                       |                       |                       |                          |                       |                          |                       |                       |                      |                       |  |
| Observed<br>rate in 2020                                                                                                                           | 2.16                  | 1.72                  | 2.16                  | 2.15                  | 2.17                     | 2.25                  | 2.5                      | 2.47                  | 2.43                  | 2.38                 | 2.36                  |  |
| Expected<br>rate in 2020<br>(95% CI)                                                                                                               | 1.88 (1.51<br>- 2.35) | 1.98 (1.44<br>- 2.74) | 2.36 (1.88<br>- 2.95) | 2.27 (2.11<br>- 2.44) | 2.19<br>(1.84 -<br>2.62) | 2.07 (1.72<br>- 2.49) | 2.08<br>(1.76 -<br>2.44) | 2.21 (2.01<br>- 2.44) | 2.13 (1.77<br>- 2.57) | 2.1 (1.72<br>- 2.58) | 1.97 (1.73<br>- 2.23) |  |
| Observed vs<br>expected<br>rate ratio<br>(95% CI)                                                                                                  | 1.15 (1.01<br>- 1.29) | 0.87 (0.75<br>- 0.99) | 0.92 (0.8<br>- 1.03)  | 0.95 (0.83<br>- 1.07) | 0.99<br>(0.87 -<br>1.11) | 1.08 (0.95<br>- 1.22) | 1.2 (1.06<br>- 1.34)     | 1.12 (0.99<br>- 1.25) | 1.14 (1.01<br>- 1.27) | 1.13 (1 -<br>1.26)   | 1.2 (1.06 -<br>1.34)  |  |
| Rates are shown in suicides per 100,000 person-years.<br>N = 602 suicides with missing data on age were not included in the age-specific analyses. |                       |                       |                       |                       |                          |                       |                          |                       |                       |                      |                       |  |

**eTable 4.** Observed and Expected Monthly Suicide Rates Among Women in 2020 Based on Trends From 2011 to 2019 Stratified by Age

|                                          | January             | February            | March               | April              | May                  | June                 | July                | August              | September           | October             | November            |
|------------------------------------------|---------------------|---------------------|---------------------|--------------------|----------------------|----------------------|---------------------|---------------------|---------------------|---------------------|---------------------|
| <b>Total</b>                             |                     |                     |                     |                    |                      |                      |                     |                     |                     |                     |                     |
| Yearly change 2011-2019, % (95% CI)      | -5.7 (-7.3 to -4.2) | -4.3 (-5.6 to -2.9) | -4.9 (-6.6 to -3.2) | -5.1 (-7.1 to -3)  | -7.2 (-10.2 to -4.3) | -6.8 (-9.4 to -4.3)  | -6.4 (-8.5 to -4.4) | -6.5 (-9.3 to -3.7) | -6.1 (-7.5 to -4.7) | -6.2 (-8.2 to -4.2) | -4.4 (-6.6 to -2.2) |
| Observed rate in 2020                    | 0.71                | 0.61                | 0.74                | 0.63               | 0.7                  | 0.75                 | 0.96                | 0.98                | 0.97                | 1.28                | 0.96                |
| Expected rate in 2020 (95% CI)           | 0.66 (0.59 - 0.75)  | 0.66 (0.59 - 0.73)  | 0.75 (0.65 - 0.85)  | 0.73 (0.62 - 0.86) | 0.71 (0.57 - 0.9)    | 0.66 (0.54 - 0.81)   | 0.7 (0.59 - 0.82)   | 0.66 (0.53 - 0.83)  | 0.67 (0.6 - 0.75)   | 0.65 (0.55 - 0.76)  | 0.69 (0.58 - 0.83)  |
| Observed vs expected rate ratio (95% CI) | 1.08 (0.98 - 1.18)  | 0.92 (0.83 - 1.01)  | 0.99 (0.9 - 1.08)   | 0.87 (0.78 - 0.95) | 0.99 (0.89 - 1.08)   | 1.13 (1.03 - 1.23)   | 1.38 (1.27 - 1.49)  | 1.48 (1.36 - 1.6)   | 1.44 (1.33 - 1.56)  | 1.97 (1.84 - 2.11)  | 1.38 (1.27 - 1.49)  |
| <b>&lt;30 y</b>                          |                     |                     |                     |                    |                      |                      |                     |                     |                     |                     |                     |
| Yearly change 2011-2019, % (95% CI)      | -4.7 (-8.4 to -1)   | -0.2 (-4.8 to 4.4)  | -2.7 (-6.2 to 0.8)  | -1.8 (-5.7 to 2.1) | -6.8 (-14.5 to 0.8)  | -8.2 (-15.9 to -0.5) | -1.4 (-7.3 to 4.5)  | -3.5 (-7.4 to 0.4)  | -4.8 (-9.6 to 0)    | -3 (-6.9 to 0.8)    | -4 (-8.8 to 0.8)    |
| Observed rate in 2020                    | 0.43                | 0.46                | 0.46                | 0.32               | 0.36                 | 0.48                 | 0.59                | 0.72                | 0.69                | 0.74                | 0.58                |
| Expected rate in 2020 (95% CI)           | 0.32 (0.24 - 0.43)  | 0.36 (0.25 - 0.52)  | 0.39 (0.3 - 0.51)   | 0.4 (0.3 - 0.55)   | 0.32 (0.17 - 0.58)   | 0.28 (0.15 - 0.51)   | 0.4 (0.25 - 0.64)   | 0.35 (0.25 - 0.47)  | 0.35 (0.24 - 0.51)  | 0.35 (0.25 - 0.47)  | 0.31 (0.22 - 0.46)  |
| Observed vs expected rate ratio (95% CI) | 1.35 (1.04 - 1.67)  | 1.27 (0.98 - 1.56)  | 1.18 (0.91 - 1.44)  | 0.79 (0.57 - 1)    | 1.12 (0.83 - 1.41)   | 1.76 (1.37 - 2.15)   | 1.48 (1.18 - 1.77)  | 2.1 (1.72 - 2.47)   | 2.01 (1.64 - 2.38)  | 2.14 (1.76 - 2.52)  | 1.83 (1.46 - 2.2)   |



|                                          |                     |                     |                     |                     |                      |                      |                      |                      |                     |                     |                    |  |
|------------------------------------------|---------------------|---------------------|---------------------|---------------------|----------------------|----------------------|----------------------|----------------------|---------------------|---------------------|--------------------|--|
| <b>30-49 y</b>                           |                     |                     |                     |                     |                      |                      |                      |                      |                     |                     |                    |  |
| Yearly change 2011-2019, % (95% CI)      | -5.7 (-8 to -3.4)   | -3.4 (-6.4 to -0.4) | -6 (-8.6 to -3.3)   | -6.6 (-9.1 to -4.1) | -8.5 (-12.8 to -4.1) | -5.9 (-10.1 to -1.7) | -8.5 (-10.2 to -6.8) | -7.1 (-9.9 to -4.2)  | -5.5 (-7.4 to -3.7) | -5.8 (-9.6 to -2)   | -4.9 (-9 to -0.8)  |  |
| Observed rate in 2020                    | 0.73                | 0.59                | 0.78                | 0.62                | 0.68                 | 0.77                 | 0.91                 | 1.07                 | 1.11                | 1.54                | 1.13               |  |
| Expected rate in 2020 (95% CI)           | 0.69 (0.58 - 0.83)  | 0.7 (0.55 - 0.89)   | 0.72 (0.59 - 0.89)  | 0.65 (0.54 - 0.8)   | 0.67 (0.47 - 0.95)   | 0.71 (0.51 - 0.99)   | 0.62 (0.55 - 0.71)   | 0.69 (0.55 - 0.86)   | 0.71 (0.61 - 0.82)  | 0.67 (0.5 - 0.91)   | 0.68 (0.49 - 0.94) |  |
| Observed vs expected rate ratio (95% CI) | 1.05 (0.86 - 1.24)  | 0.84 (0.67 - 1.01)  | 1.08 (0.89 - 1.26)  | 0.95 (0.76 - 1.13)  | 1.01 (0.82 - 1.2)    | 1.09 (0.9 - 1.28)    | 1.45 (1.22 - 1.69)   | 1.56 (1.32 - 1.79)   | 1.57 (1.34 - 1.8)   | 2.3 (2.01 - 2.58)   | 1.66 (1.41 - 1.9)  |  |
| <b>50-69 y</b>                           |                     |                     |                     |                     |                      |                      |                      |                      |                     |                     |                    |  |
| Yearly change 2011-2019, % (95% CI)      | -6.6 (-9.3 to -3.9) | -5.5 (-7.1 to -3.8) | -5.5 (-6.4 to -4.7) | -5.1 (-7.6 to -2.6) | -5.8 (-8.4 to -3.2)  | -8.2 (-9.6 to -6.7)  | -6.3 (-8.7 to -4)    | -7.2 (-10.9 to -3.5) | -6.7 (-8.4 to -5)   | -6.7 (-8.7 to -4.7) | -5 (-7.5 to -2.5)  |  |
| Observed rate in 2020                    | 0.81                | 0.61                | 0.91                | 0.77                | 0.8                  | 0.78                 | 1.17                 | 1.05                 | 1.04                | 1.42                | 1.1                |  |
| Expected rate in 2020 (95% CI)           | 0.77 (0.62 - 0.95)  | 0.77 (0.68 - 0.88)  | 0.87 (0.81 - 0.93)  | 0.86 (0.7 - 1.05)   | 0.91 (0.74 - 1.12)   | 0.71 (0.63 - 0.79)   | 0.85 (0.71 - 1.03)   | 0.73 (0.55 - 0.99)   | 0.72 (0.63 - 0.82)  | 0.75 (0.64 - 0.88)  | 0.79 (0.65 - 0.97) |  |
| Observed vs expected rate ratio (95% CI) | 1.05 (0.87 - 1.23)  | 0.79 (0.63 - 0.94)  | 1.05 (0.88 - 1.21)  | 0.9 (0.75 - 1.06)   | 0.88 (0.73 - 1.03)   | 1.1 (0.91 - 1.29)    | 1.38 (1.18 - 1.57)   | 1.43 (1.22 - 1.65)   | 1.45 (1.23 - 1.67)  | 1.89 (1.65 - 2.14)  | 1.39 (1.18 - 1.59) |  |
| <b>≥70 y</b>                             |                     |                     |                     |                     |                      |                      |                      |                      |                     |                     |                    |  |

|                                                                                                                                                                           |                     |                     |                     |                    |                      |                     |                    |                    |                      |                    |                     |
|---------------------------------------------------------------------------------------------------------------------------------------------------------------------------|---------------------|---------------------|---------------------|--------------------|----------------------|---------------------|--------------------|--------------------|----------------------|--------------------|---------------------|
| Yearly change 2011-2019, % (95% CI)                                                                                                                                       | -5.9 (-8.2 to -3.6) | -6.5 (-8.6 to -4.4) | -4.8 (-8.3 to -1.4) | -6.2 (-8.5 to -4)  | -8.5 (-10.4 to -6.7) | -6.6 (-9.1 to -4.2) | -8 (-11.5 to -4.5) | -7.7 (-11 to -4.3) | -7.7 (-11.7 to -3.6) | -8.4 (-10.8 to -6) | -4.7 (-6.6 to -2.7) |
| Observed rate in 2020                                                                                                                                                     | 0.9                 | 0.76                | 0.81                | 0.83               | 0.98                 | 0.96                | 1.19               | 1.09               | 1.05                 | 1.41               | 1.02                |
| Expected rate in 2020 (95% CI)                                                                                                                                            | 0.87 (0.73 - 1.05)  | 0.78 (0.66 - 0.92)  | 1.02 (0.78 - 1.34)  | 1 (0.84 - 1.19)    | 0.95 (0.83 - 1.1)    | 0.96 (0.79 - 1.17)  | 0.9 (0.68 - 1.19)  | 0.88 (0.67 - 1.14) | 0.91 (0.66 - 1.25)   | 0.81 (0.67 - 0.98) | 0.98 (0.84 - 1.14)  |
| Observed vs expected rate ratio (95% CI)                                                                                                                                  | 1.03 (0.86 - 1.2)   | 0.98 (0.8 - 1.15)   | 0.79 (0.66 - 0.93)  | 0.83 (0.69 - 0.97) | 1.02 (0.86 - 1.18)   | 1 (0.84 - 1.16)     | 1.32 (1.13 - 1.51) | 1.24 (1.06 - 1.43) | 1.15 (0.98 - 1.32)   | 1.74 (1.51 - 1.97) | 1.04 (0.88 - 1.2)   |
| Rates are shown in suicides per 100,000 person-years.<br>N = 116 individuals who died of suicide with missing data on age were not included in the age-specific analyses. |                     |                     |                     |                    |                      |                     |                    |                    |                      |                    |                     |

**eFigure 1.** Observed and Expected Monthly Number of Individuals Who Died of Suicide in January Through November, 2011 to 2020, by Occupational Status Category

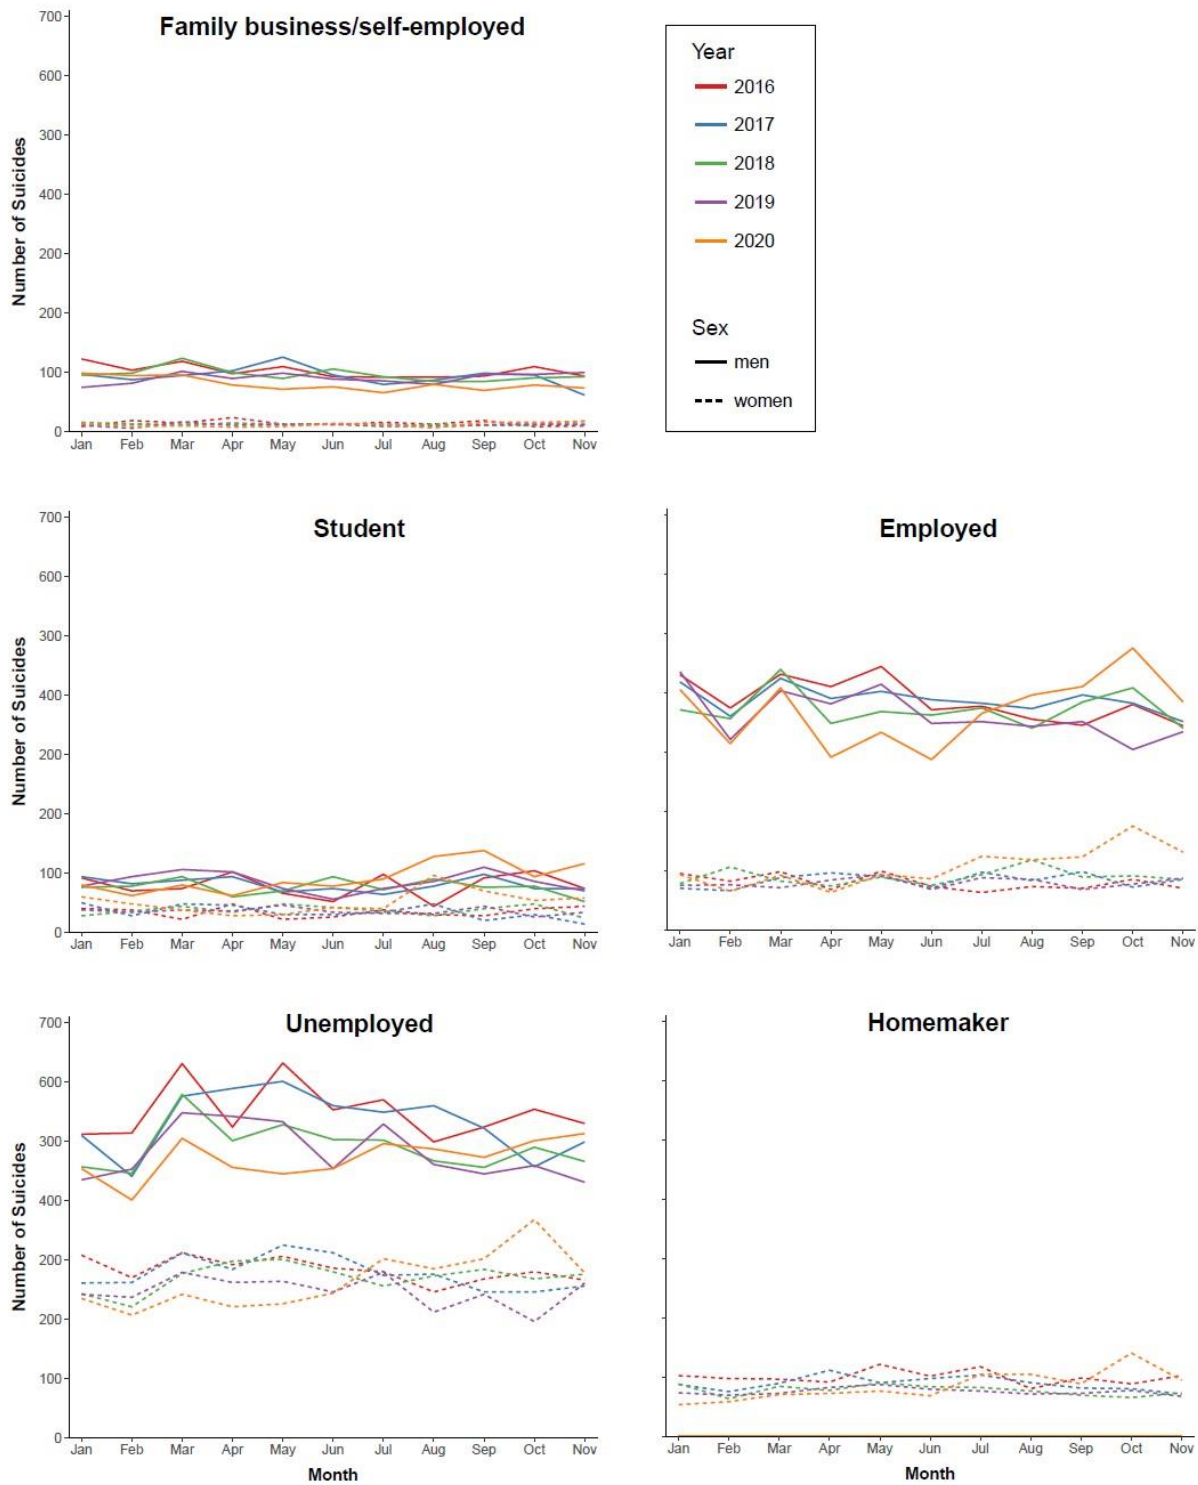

**eFigure 2.** Observed and Expected Monthly Suicide Rates in January to November, 2011 to 2020, in All Ages

Light colored areas represent 95% CI for expected suicide rates and dots represent the observed rates

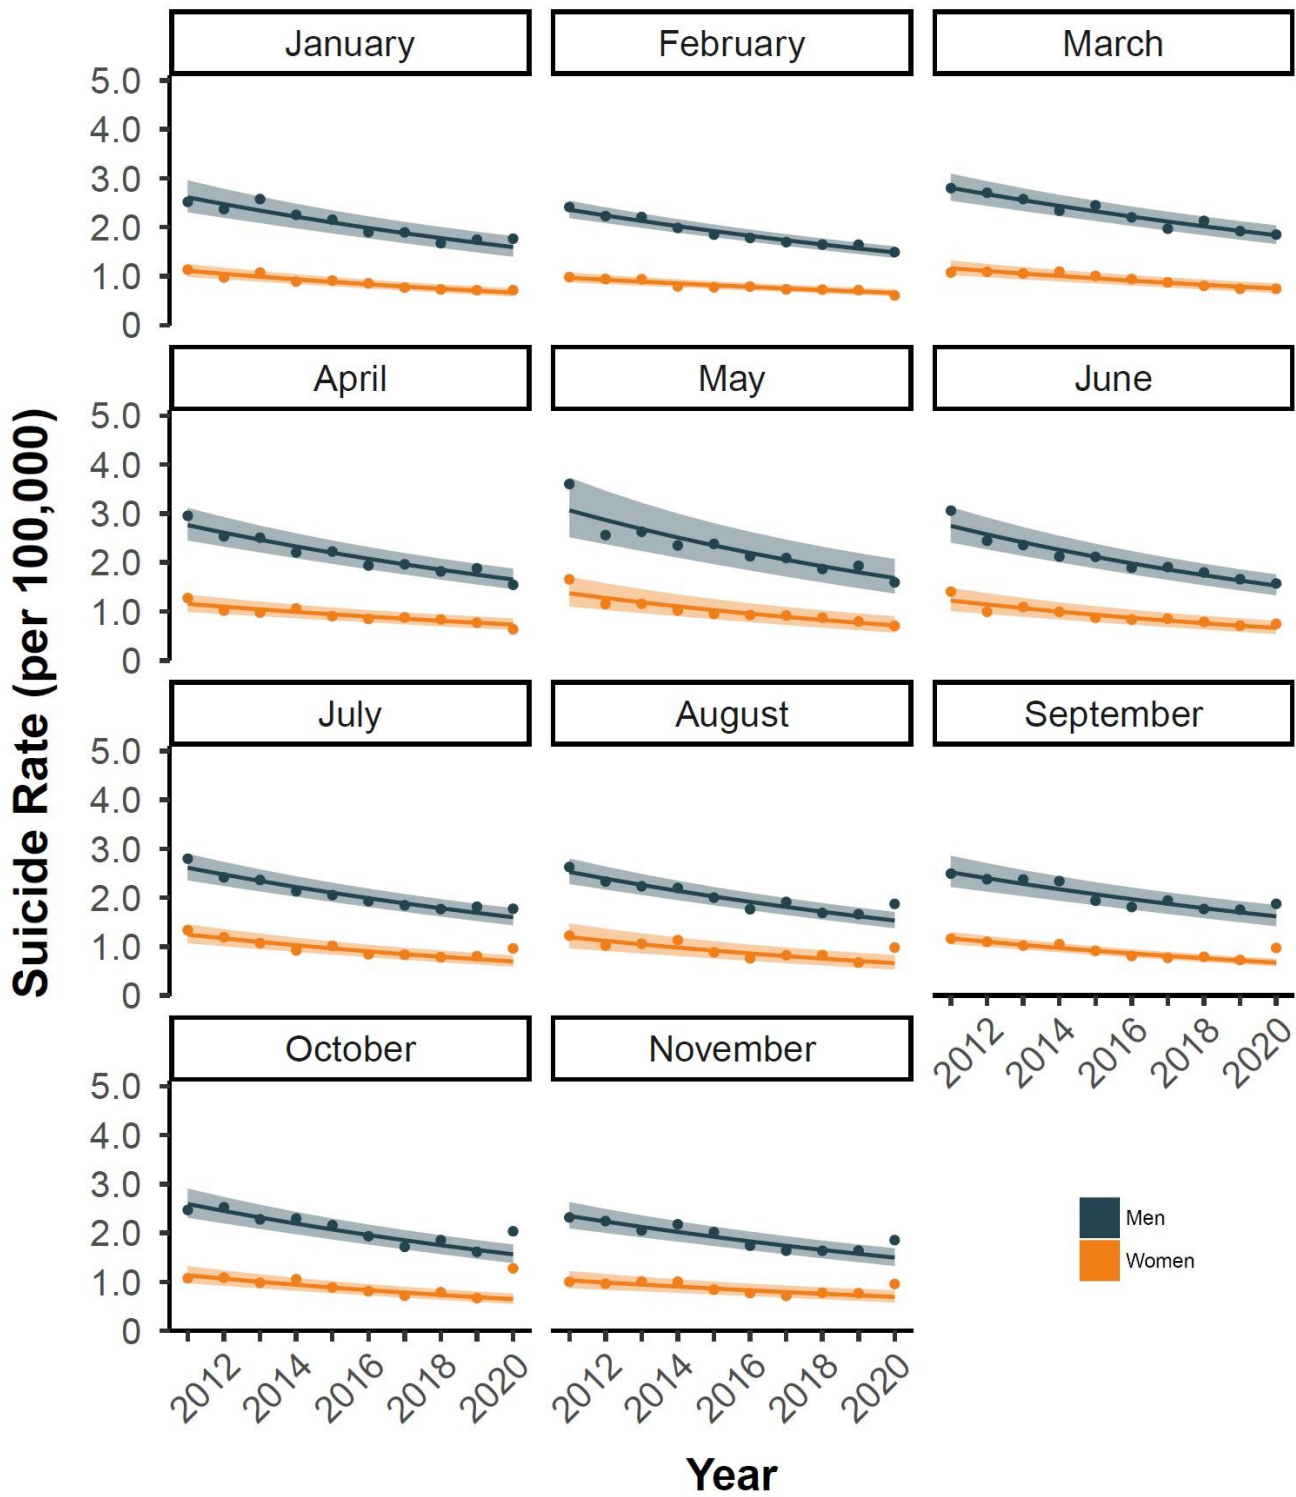

**Figure 3.** Observed and Expected Monthly Suicide Rates in January to November, 2011 to 2020, Among Individuals Aged Younger Than 30 Years  
 Light colored areas represent 95% CI for expected suicide rates and dots represent the observed rates

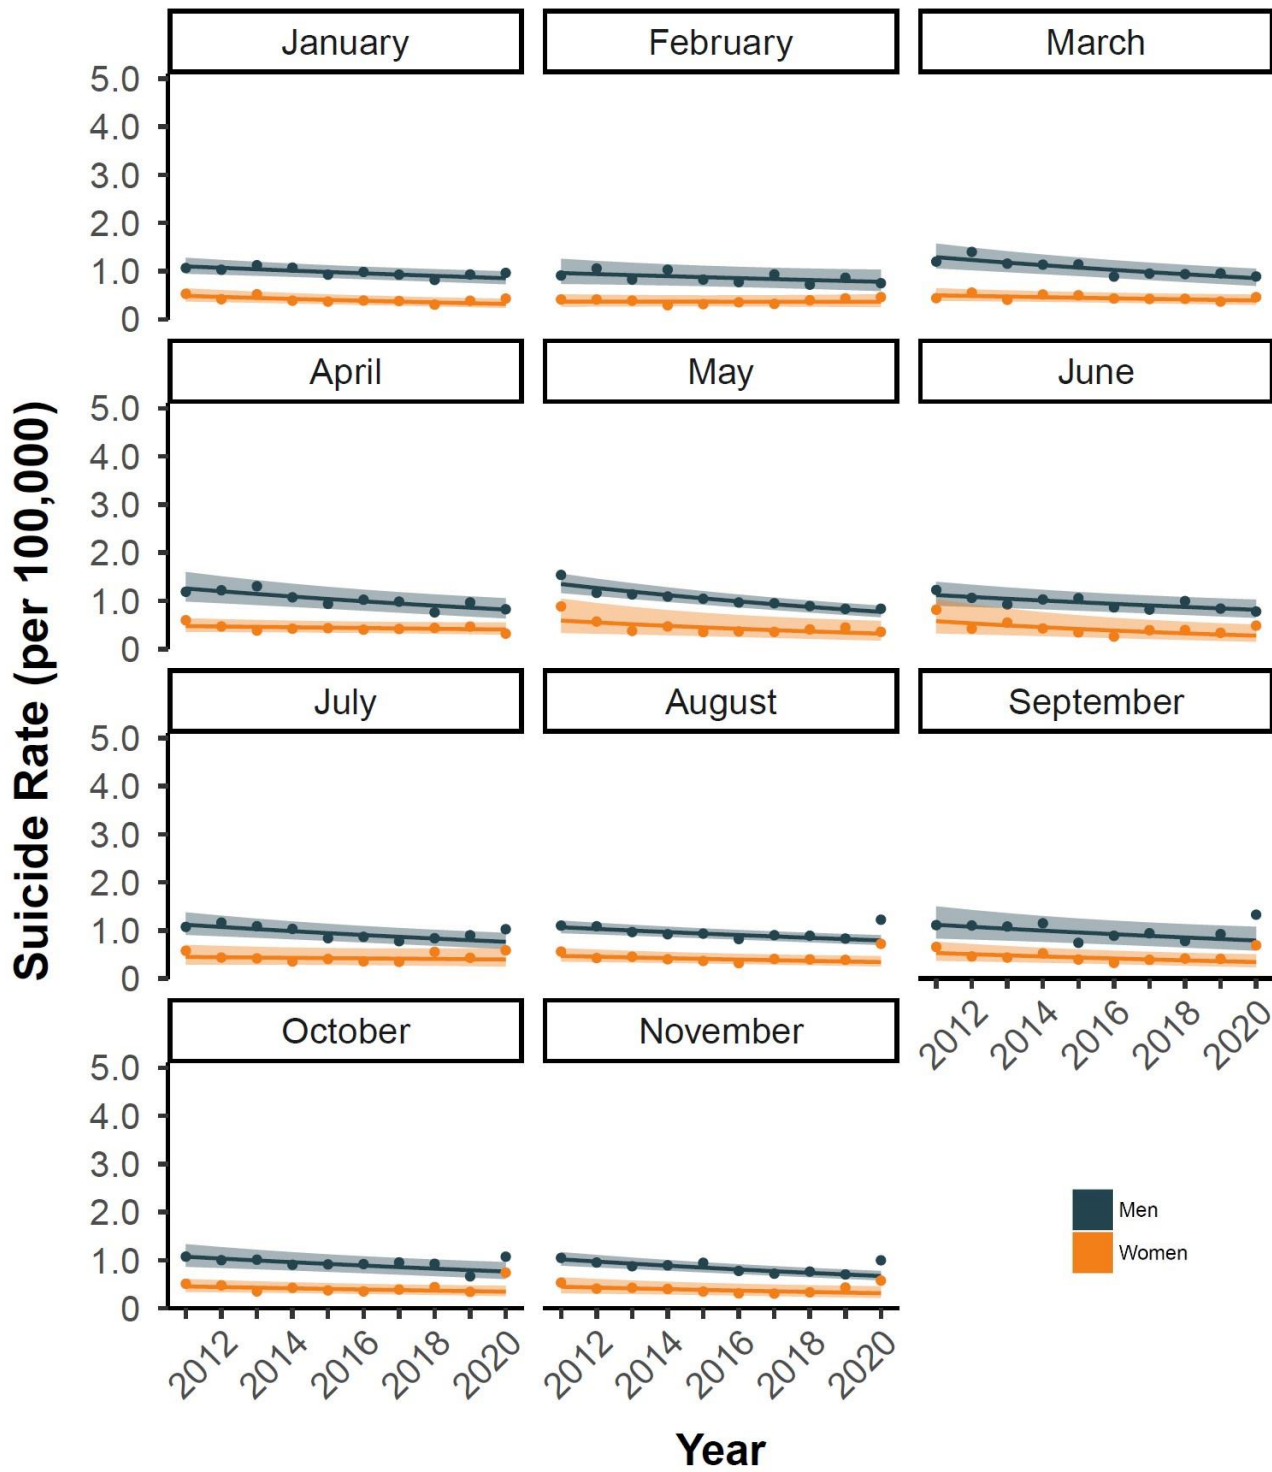

**Figure 4.** Observed and Expected Monthly Suicide Rates in January to November, 2011 to 2020, Among Individuals Aged 30 to 49 Years  
 Light colored areas represent 95% CI for expected suicide rates and dots represent the observed rates

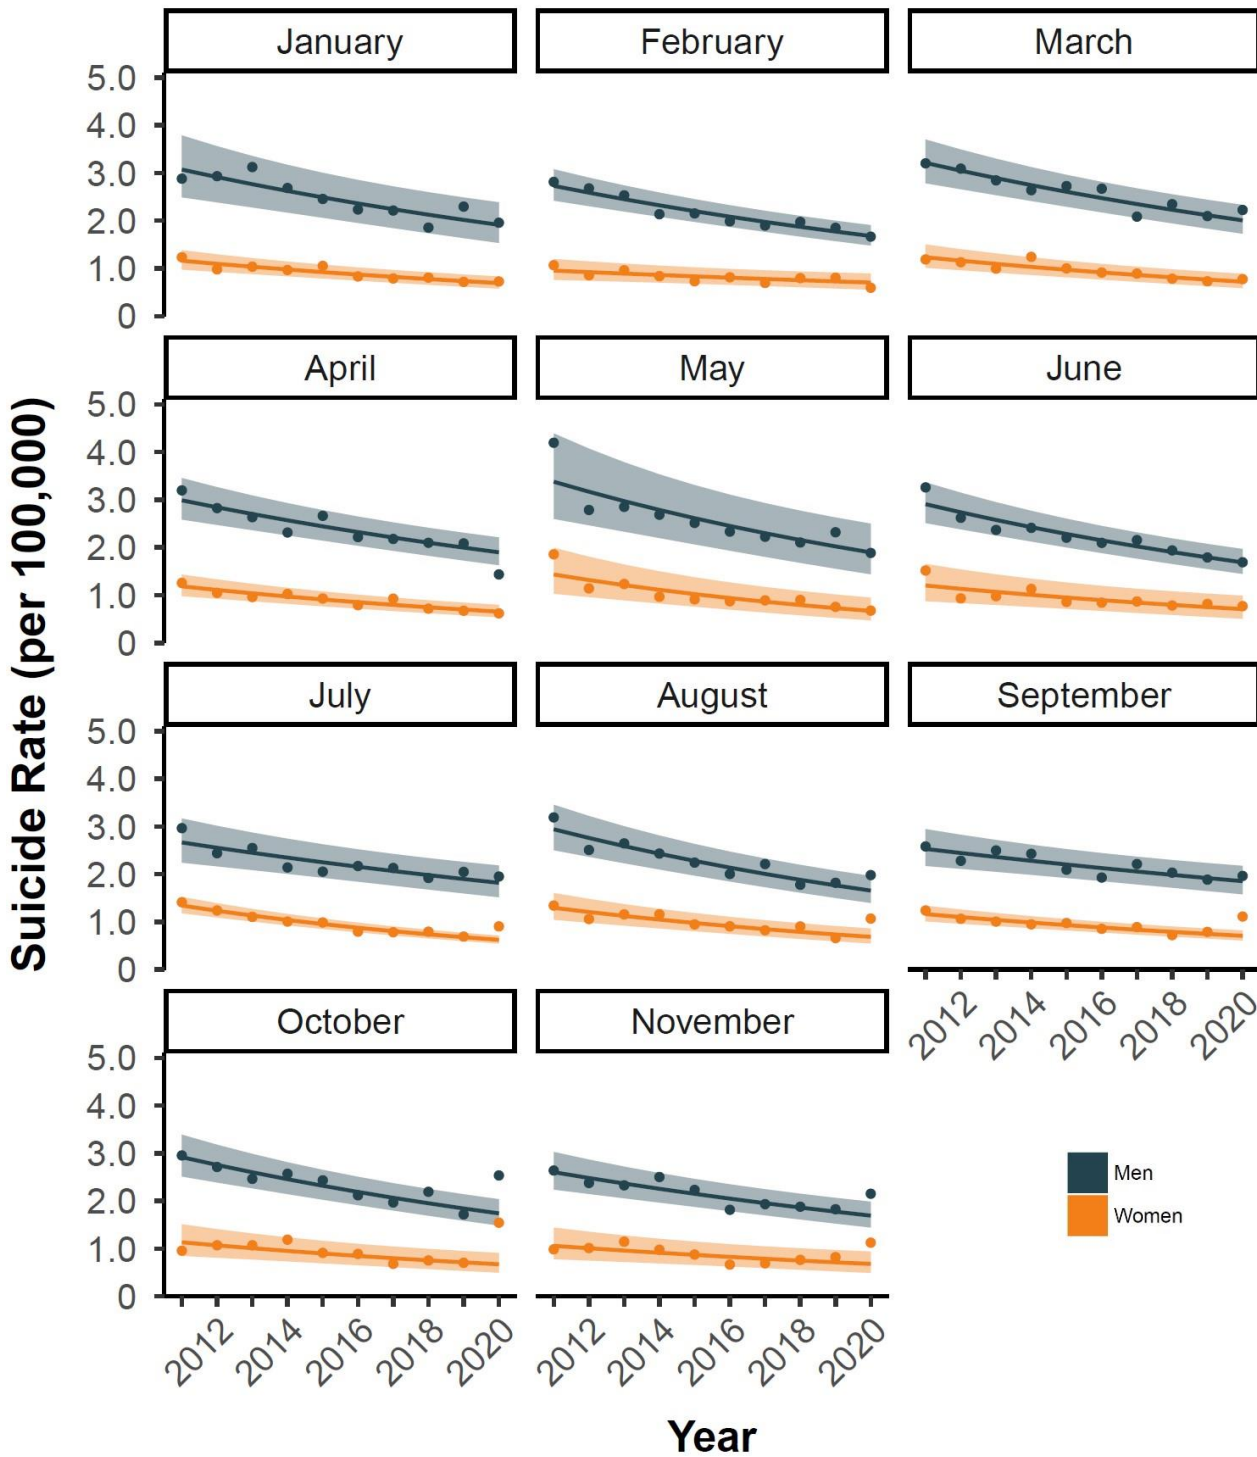

**Figure 5.** Observed and Expected Monthly Suicide Rates in January to November, 2011 to 2020, Among Individuals Aged 50 to 69 Years

Light colored areas represent 95% CI for expected suicide rates and dots represent the observed rates

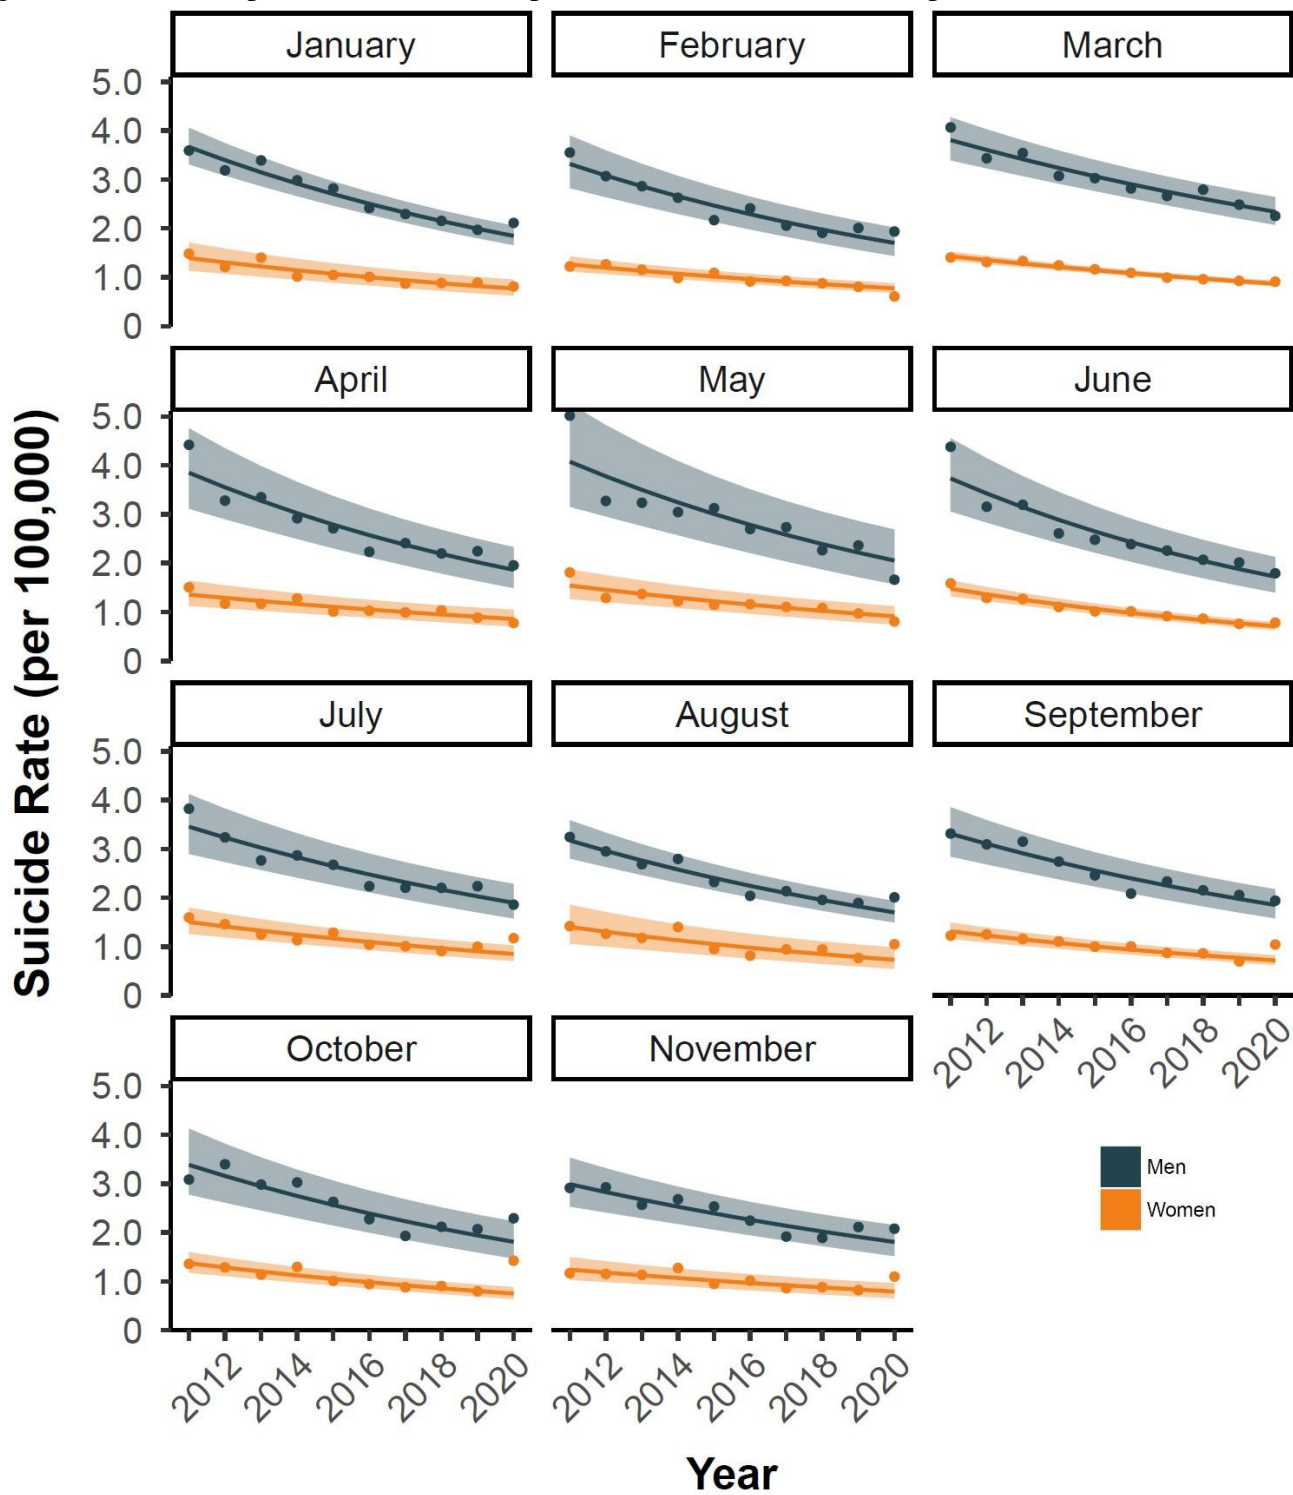

**Figure 6.** Observed and Expected Monthly Suicide Rates in January to November, 2011 to 2020, Among Individuals Aged 70 Years or Older  
 Light colored areas represent 95% CI for predicted suicide rates and dots represent the observed rates

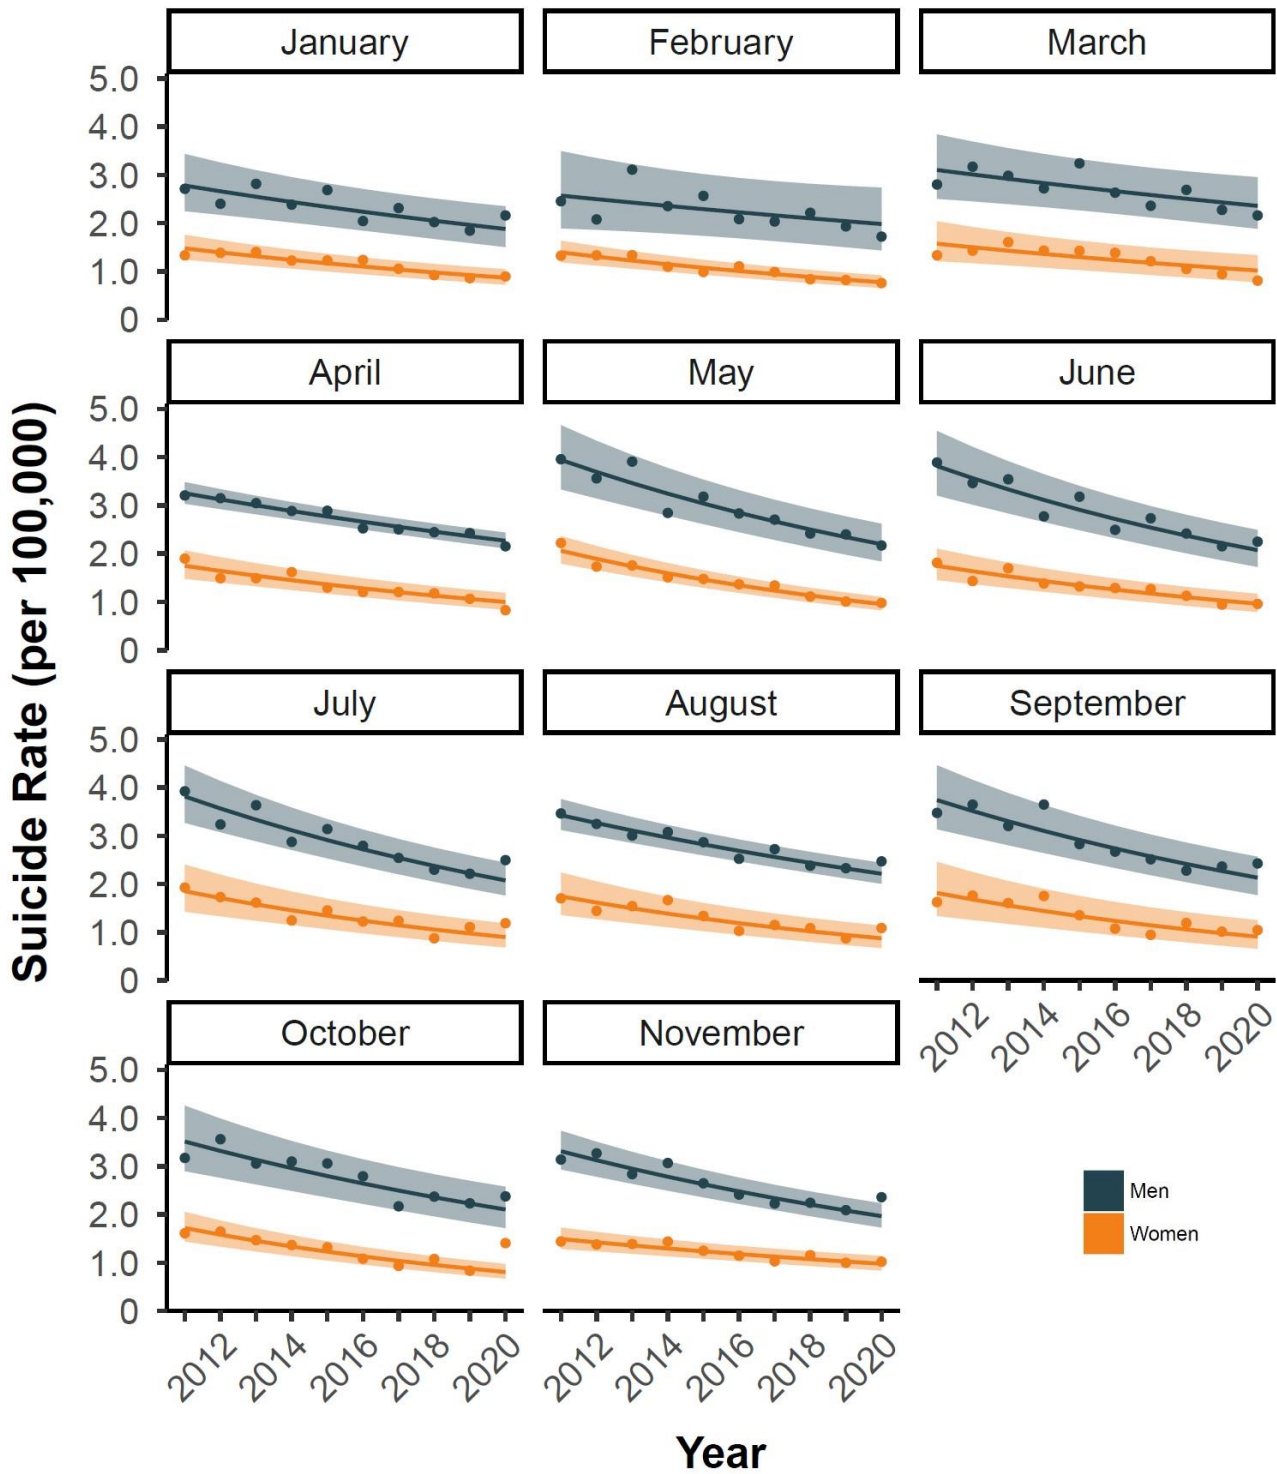

Supplement: jamanetwopen-e2037378-s001.pdf [file jamanetwopen-e2037378-s001.pdf]
